# Supplementary material for: A Case–Control Study by ddPCR of ALU 260/111 and LINE-1 266/97 Copy Number Ratio in Circulating Cell-Free DNA in Plasma Revealed LINE-1 266/97 as a Potential Biomarker for Early Breast Cancer Detection
Source: MDPI journal article supplement (doi:10.3390/ijms24108520), 2023-05-10
Supplement: s1 [file s1]

**Table S1. ALU260/111 copy number ratio in BC patients and Healthy controls**

|                         | min  | median | max   |
|-------------------------|------|--------|-------|
| <b>BC patients</b>      | 0.03 | 0.0795 | 0.34* |
| <b>Healthy controls</b> | 0.02 | 0.093  | 0.5   |

\* $p < 0.001$ , Mann-Withney

**Table S2 . LINE-1 266/97 copy number ratio in BC patients and Healthy controls**

|                         | min  | median | max   |
|-------------------------|------|--------|-------|
| <b>BC patients</b>      | 0.08 | 0.19   | 0.20* |
| <b>Healthy controls</b> | 0.04 | 0.27   | 0.6   |

\* $p < 0.001$ , Mann-Withney

**Table S3. Pairwise comparison of ROC curves**

| Variable<br>(copy number ratio) | AUC  | SE   | 95% CI       | $p$ -value |
|---------------------------------|------|------|--------------|------------|
| <b>ALU 260/111</b>              | 0.69 | 0.04 | 0.62 to 0.76 | 0.0067     |
| <b>LINE-1 266/97</b>            | 0.80 | 0.03 | 0.73 to 0.86 |            |

$p = 0.0067$ , De-Long
